# Supplementary material
Source: MDPI journal article supplement (https://www.mdpi.com/2073-4433/10/3/155)
Supplement: s1 [file s1]

# Supporting Information for "Simulating Sundowner winds in coastal Santa Barbara: model validation and sensitivity"

February 26, 2019

*Table 1: Index of stations, elevation, locations and type for the 30 surface stations shown in Figure 1b of the main article. Abbreviations for station type can be found in the main article.*

| <b>Id.</b> | <b>Stations</b> | <b>Elevation [m]</b> | <b>Long.</b> | <b>Lat.</b> | <b>Type</b> |
|------------|-----------------|----------------------|--------------|-------------|-------------|
| 1          | ANIC1           | 84                   | -119.363     | 34.015      | RAWS        |
| 2          | CSVC1           | 195                  | -119.371     | 34.408      | RAWS        |
| 3          | CUUC1           | 1609                 | -119.014     | 34.806      | RAWS        |
| 4          | FGMC1           | 970                  | -120.007     | 34.734      | RAWS        |
| 5          | KCMA            | 23                   | -119.083     | 34.217      | NWS         |
| 6          | KIZA            | 205                  | -120.076     | 34.607      | NWS         |
| 7          | KLPC            | 27                   | -120.467     | 34.667      | NWS         |
| 8          | KNTD            | 3                    | -119.122     | 34.124      | NWS         |
| 9          | KOXR            | 13                   | -119.203     | 34.201      | NWS         |
| 10         | KRTC1           | 1518                 | -118.963     | 34.824      | RAWS        |
| 11         | KSBA            | 3                    | -119.844     | 34.426      | NWS         |
| 12         | KSMX            | 74                   | -120.452     | 34.894      | NWS         |
| 13         | KVBG            | 112                  | -120.577     | 34.729      | NWS         |
| 14         | LCBC1           | 15                   | -118.936     | 34.045      | RAWS        |
| 15         | LPOC1           | 299                  | -119.791     | 34.544      | RAWS        |
| 16         | MOIC1           | 87                   | -119.626     | 34.445      | RAWS        |
| 17         | MPWC1           | 455                  | -119.796     | 34.491      | RAWS        |
| 18         | MTIC1           | 494                  | -119.649     | 34.461      | RAWS        |
| 19         | OXLFC           | 189                  | -120.046     | 34.490      | SBCAPCD     |
| 20         | OZNC1           | 1125                 | -119.354     | 34.682      | RAWS        |
| 21         | RHWC1           | 447                  | -120.075     | 34.517      | RAWS        |
| 22         | ROVC1           | 1015                 | -119.185     | 34.543      | RAWS        |
| 23         | SBVC1           | 230                  | -119.706     | 34.456      | RAWS        |
| 24         | SNCC1           | 89                   | -119.716     | 33.993      | RAWS        |
| 25         | SRIC1           | 391                  | -120.079     | 33.979      | RAWS        |
| 26         | TSQC1           | 975                  | -120.181     | 34.920      | RAWS        |
| 27         | TT367           | 656                  | -119.671     | 34.468      | RAWS        |
| 28         | TT414           | 293                  | -120.617     | 34.580      | RAWS        |
| 29         | VDBC1           | 310                  | -120.486     | 34.759      | RAWS        |
| 30         | WLYC1           | 501                  | -118.841     | 34.372      | RAWS        |
